# Supplementary material
Source: Springer Nature journal article supplement (https://www.springermedizin.de/resource/supplementary/12876_2006_187_MOESM4_ESM.pdf/9438882)

AVE  
LIGHT+4  
FILM 08

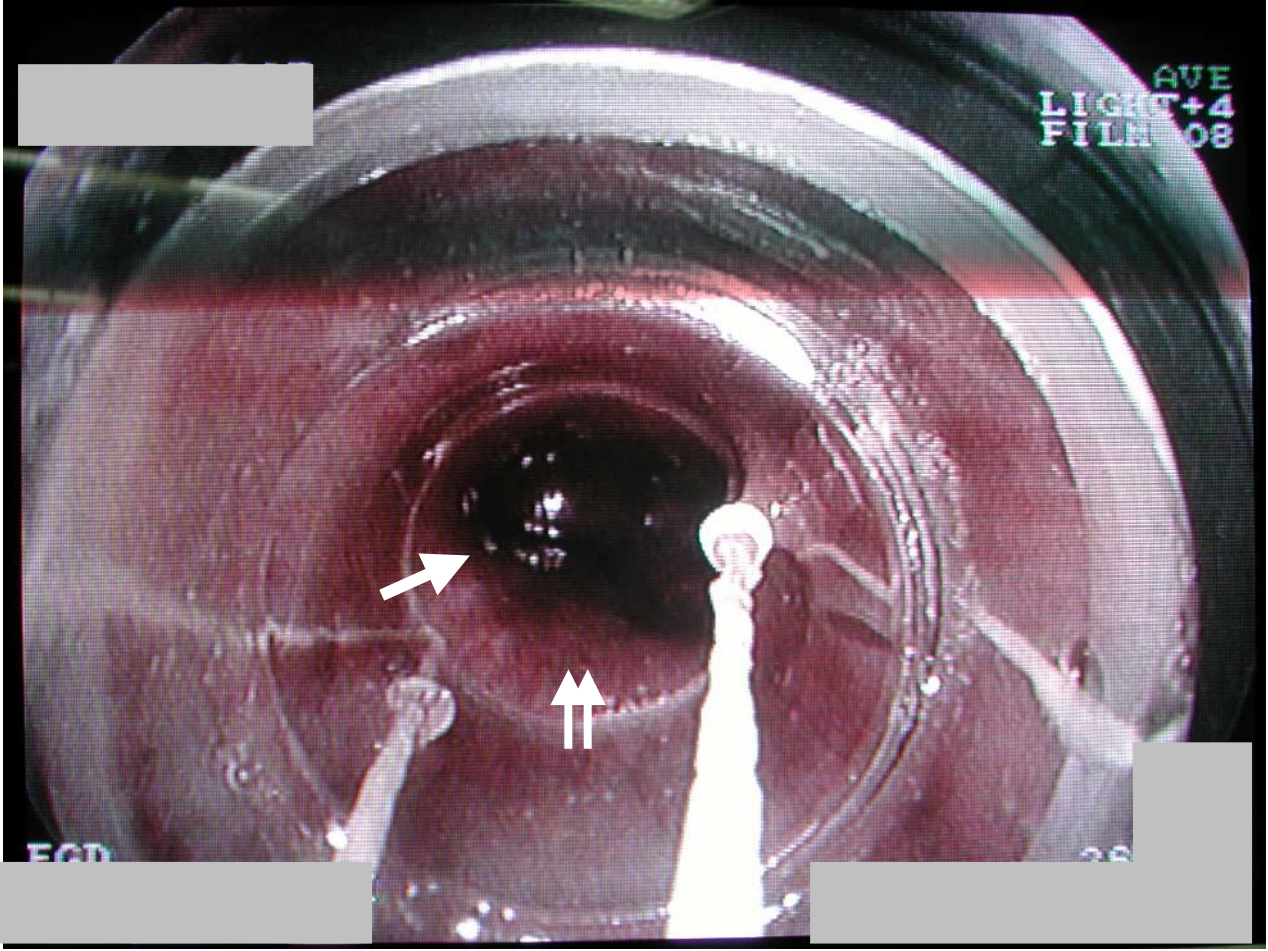

EGD

26

Supplement: MOESM4 [file 9438882]
